# Supplementary material
Source: Springer Nature journal article supplement (https://www.springermedizin.de/resource/supplementary/12889_2013_5731_MOESM1_ESM.pdf/9496014)
Supplement: MOESM1 [file 9496014]

## PHYSICAL ENVIRONMENT

### Built and Natural

#### Physical Attributes

*Setting/resource number*

*Ease of access/proximity*

• Connectivity

• Density

• Mixed-use

*Perceived attributes*

*Physical homogeneity*

X

#### Life Domains

*Work/school*

*Home*

*Leisure*

*Transport*

## SOCIAL NETWORK ENVIRONMENT

#### Population Attributes

*Population number*

*Population density*

*Population individual attributes*

• Demographic

• Biological

• Psychological

*Population homogeneity*

X

#### Interaction Mode

*Virtual*

• Online-text based

• Online social network

• Video- or web-conference/chat

• Phone

*In-person*

*Mobile/stationary*

## SOCIAL NETWORK INTERACTIONS

#### Social Network Structure

*Network centrality*

*Network transitivity*

*Network relational attributes*

• Network physical proximity

• Network relationship role(s)

*Network individual attributes*

• Demographic

• Biological

• Psychological

*Network homogeneity*

X

#### Social Network Functions

*Behavioral*

• Modeling/norms

• Resources/assistance/companionship

• Encouragement/praise/criticism

• Behavioral monitoring & refinement

*Perceived*

• Benefits and costs

• Emotions

• Exertion/pain
